# Supplementary material
Source: PubMed Central journal article supplement (PMC9378472)

Supplementary Materials

Supplementary Table 1

*Item Frequencies for the Screen for Nonsuicidal Self-Injury (SNSI) Questions (Continuous Items)*

| SNSI Item Description                                                                                                                                       | Current Endorsement %                        |      |      |     |      |                                    |     |     |   |     |
|-------------------------------------------------------------------------------------------------------------------------------------------------------------|----------------------------------------------|------|------|-----|------|------------------------------------|-----|-----|---|-----|
|                                                                                                                                                             | Current NSSI Disorder <sup>a</sup><br>n = 41 |      |      |     |      | No Current NSSI Disorder<br>n = 83 |     |     |   |     |
|                                                                                                                                                             | 1                                            | 2    | 3    | 4   | 5+   | 1                                  | 2   | 3   | 4 | 5+  |
| <b>Have you ever intentionally cut yourself? (e.g., on your wrists, legs, or torso)</b>                                                                     | 9.8                                          | 4.9  | 4.9  | 2.4 | 4.9  | -                                  | -   | -   | - | -   |
| <b>Have you ever intentionally burned yourself? (e.g., with a lighter or cigarette)</b>                                                                     | 4.9                                          | 2.4  | -    | 4.9 | -    | -                                  | -   | -   | - | -   |
| <b>Have you ever intentionally scratched yourself to the point that you bled or it left a mark?</b>                                                         | 2.4                                          | 12.2 | 9.8  | 7.3 | 14.6 | -                                  | 1.2 | -   | - | 3.6 |
| Have you ever intentionally carved words, pictures, or designs into your skin?                                                                              | 2.4                                          | -    | -    | -   | -    | 1.2                                | -   | -   | - | -   |
| <b>Have you ever intentionally bitten your cheeks, lips, or other parts of your body to the point of bleeding or breaking the skin?</b>                     | 2.4                                          | 2.4  | 17.1 | 2.4 | 17.1 | 1.2                                | 1.2 | -   | - | 3.6 |
| <b>Have you ever intentionally stuck sharp objects (e.g., needles, pins, staples) into your skin?</b>                                                       | 4.9                                          | 4.9  | 4.9  | 4.9 | 14.6 | 3.6                                | 1.2 | -   | - | -   |
| <b>Have you ever intentionally banged your head against walls or objects to the point of bruising or bleeding?</b>                                          | -                                            | 7.3  | 7.3  | 4.9 | 9.8  | 2.4                                | -   | -   | - | -   |
| <b>Have you ever intentionally punched or hit yourself to the point of bruising or bleeding?</b>                                                            | 7.3                                          | 19.5 | -    | 4.9 | 9.8  | 1.2                                | -   | -   | - | -   |
| <b>Have you ever intentionally punched or hit walls or objects to the point of bruising or bleeding?</b>                                                    | 17.1                                         | 19.5 | 17.1 | 4.9 | 8    | 4.8                                | 6.0 | 3.6 | - | 1.2 |
| Have you ever intentionally put bleach, cleaning supplies, or acid onto your skin for the purpose of hurting yourself?                                      | -                                            | -    | -    | -   | -    | -                                  | -   | -   | - | -   |
| <b>Have you ever intentionally prevented wounds from healing?</b>                                                                                           | 4.9                                          | 9.8  | 4.9  | -   | 4.9  | -                                  | 1.2 | 1.2 | - | 2.4 |
| Have you ever intentionally rubbed your skin with glass or sandpaper until it left a mark?                                                                  | -                                            | 2.4  | 2.4  | -   | -    | -                                  | -   | -   | - | 1.2 |
| Have you ever intentionally broken your own bones or tried to break your own bones?                                                                         | -                                            | -    | -    | -   | -    | -                                  | -   | -   | - | -   |
| Have you ever engaged in fighting or other aggressive activities with the specific intention of getting hurt?                                               | 2.4                                          | -    | -    | -   | -    | 1.2                                | -   | -   | - | -   |
| Have you ever intentionally ingested (swallowed) a dangerous substance(s) or sharp object(s), such as Drano, other cleaning substances, pins)?              | -                                            | -    | -    | -   | -    | -                                  | -   | -   | - | -   |
| <b>Have you ever done anything else to intentionally hurt or mutilate your body on purpose that resulted in tissue damage (e.g., bruising or bleeding)?</b> | 7.3                                          | 4.9  | -    | -   | 9.8  | -                                  | -   | -   | - | -   |

Note: <sup>a</sup>NSSI disorder as assessed by the Clinician-Administered NSSI Disorder Index (CANDI); NSSI = nonsuicidal self-injury; Bold items indicate items included in final versions of measure; - = no endorsement.

Supplementary Table 2  
*Performance of the SNSI Based on Demographic Characteristics*

|                              | SNSI Items<br>AUC [95% CI] |                   |
|------------------------------|----------------------------|-------------------|
|                              | Dichotomous                | Continuous        |
| <u>Age</u>                   |                            |                   |
| Under 55                     | .89<br>[.81, .96]          | .89<br>[.82, .97] |
| 55+                          | .96<br>[.91, .99]          | .97<br>[.93, .99] |
| <u>Sex Assigned at Birth</u> |                            |                   |
| Female                       | .94<br>[.84, .99]          | .93<br>[.82, .99] |
| Male                         | .89<br>[.82, .96]          | .91<br>[.84, .98] |
| <u>Race</u>                  |                            |                   |
| Non-white                    | .89<br>[.81, .98]          | .91<br>[.83, .99] |
| White                        | .92<br>[.81, .98]          | .92<br>[.83, .99] |

*Note:* AUC = area under the curve, CI = confidence interval; Sex = sex assigned at birth; SNSI predicting current NSSI disorder as assessed by the Clinician-Administered NSSI Disorder Index (CANDI); NSSI = nonsuicidal self-injury; no-significant differences between demographic categories predicting NSSI disorder (all bootstrapped Venkatraman's tests  $p > .05$ ).

Supplementary Table 3  
*Predictive Validity of the SNSI*

|                        | SNSI Items<br>AUC [95% CI] |                   |
|------------------------|----------------------------|-------------------|
|                        | Dichotomous                | Continuous        |
| 12-Month NSSI Disorder | .88<br>[.81, .96]          | .89<br>[.82, .96] |
| 12-Month C-SSRS NSSI   | .90<br>[.82, .97]          | .89<br>[.81, .96] |

*Note:* AUC = area under the curve; NSSI disorder as assessed by the Clinician-Administered NSSI Disorder Index (CANDI); NSSI = nonsuicidal self-injury, C-SSRS = Columbia Suicide Severity Rating Scale, AUC = area under the curve, CI = confidence interval.

Supplementary Figure 1  
*Principal Component Analysis and Parallel Analysis Scree Plots*

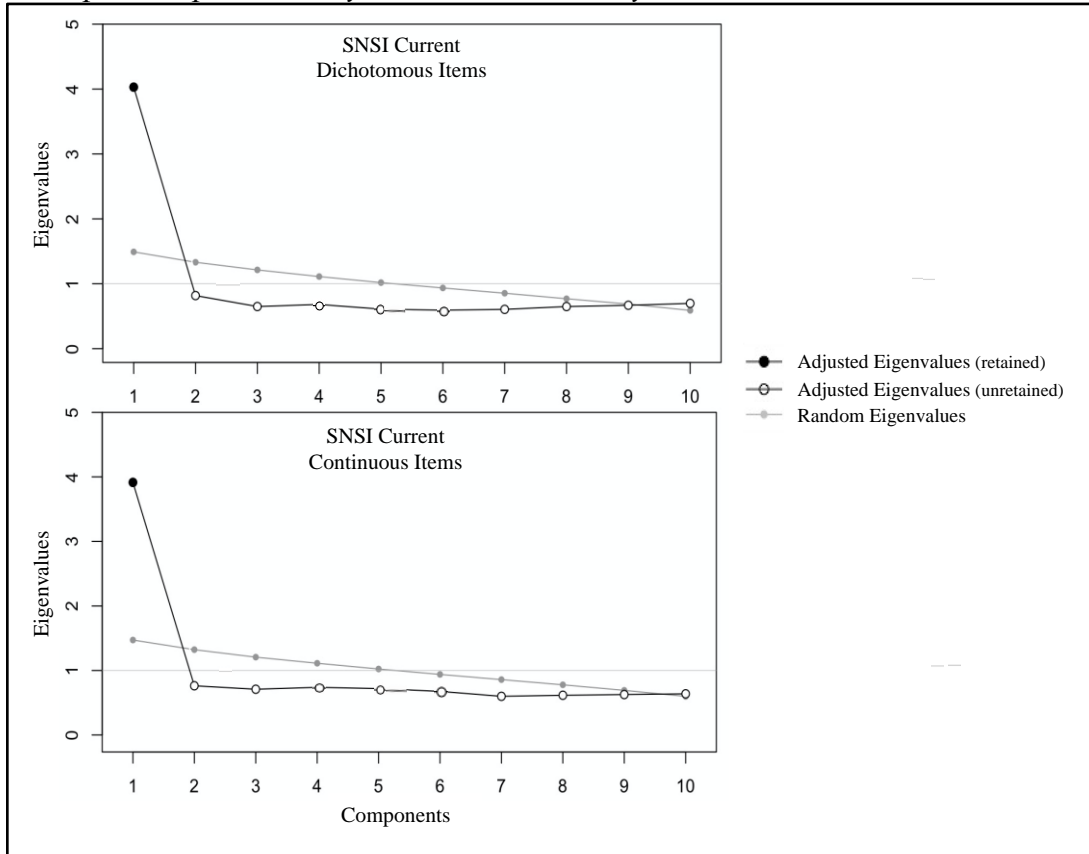

Supplement: NIHMS1804073-supplement-1.pdf [file NIHMS1804073-supplement-1.pdf]
